# Supplementary material for: Intraspecific body size variation and allometry of genitalia in the orb-web spider—Argiope lobata
Source: PeerJ. 2023 Nov 28;11:e16413. doi: 10.7717/peerj.16413 (PMC10691382; doi:10.7717/peerj.16413)
Supplement: Data S1 [file peerj-11-16413-s001.xlsx]

## Sheet: Kai_Brödje LA2011_ Argiope loba
Female ID	TPL Links	TPL rechts	TPL mean	Cara width	Cara length	Cop yes/no	Scapus length	Scapus angle	Scapus width	dateExperiment	Time Male in	Time WebContact	Time Female contakt	Time Start Courtship	Time Cop ends	Cop Duration	Male ID	Male TPL links	Male TPL rechts	mean male TPL	Male cara width	Male cara length	Pedi Apo	Spur	Cannibalism y/n	Leg lost	Male Carapax surface	Female carapax breite	TPL fem-male	log cop dur
Al1 129	10015	9905	9960	6014	6934	y	668	61	874	14.07.2010	12:38:51	12:43:00	12:44:51	12:45:57	12:48:36	31	Al6 653	4012	3099	3555.5	2179	2558	85426	369	y	y	5573882	41701076	6404.5	3.43399
Al1 148	10379	10382	10380.5	5895	6667	y	820	66	908	01.07.2010	12:08:20	12:08:35	12:14:09	12:51:00	12:53:37	30	Al9 606		3345	3345	2199	2682	100429	387	y	y	5897718	39301965	7035.5	3.4012
Al1 623	10828	10788	10808	6251	7440	y	811	63	868	24.08.2010	12:09:32	12:31:51	12:33:13	12:33:28	12:48:10	285	Al8 1	4042	4016	4029	2356	2842	105221	350	n	n	6695752	46507440	6779	5.65249
Al3 44	9348	9326	9337	5295	6363	y	655	63	726	18.06.2010	10:55:55	11:17:30	11:19:15	11:19:56	11:32:59	19	Al1 587	4484	4477	4480.5	2499	3100	103992	374	y	y	7746900	33692085	4856.5	2.94444
Al3 513	9921	9999	9960	5730	6807	y	651	69	730	14.07.2010	10:47:31	10:47:35	10:49:00	11:09:37	12:09:29	23	Al4 477	4379		4379	2437	2943	97362	326	y	y	7172091	39004110	5581	3.13549
Al3 61	9371	9428	9399.5	5365	6598	y	708	68	804	18.06.2010	09:49:10	10:08:29	10:12:27	10:12:42	10:15:46	25	Al1 292	4464		4464	2461	3054	97050	366	y	y	7515894	35398270	4935.5	3.21888
Al4 104	9801	10151	9976	5852	7191	y	722	70	810	24.08.2010	12:11:08	12:15:00	12:16:35	12:24:50	12:30:06	243	Al8 35	3958	3959	3958.5	2295	2778	88793	393	n	n	6375510	42081732	6017.5	5.49306
Al4 480	10590	10586	10588	6108	7026	y	794	66	899	14.07.2010	10:49:05	11:09:22	12:53:20	12:55:20	12:58:48	10	Al1 609		4025	4025	2268	2740	86095	327	y	y	6214320	42914808	6563	2.30259
Al4 719	9873	9814	9843.5	5415	6517	y	677	60	848	16.08.2010	13:10:12	13:19:18	13:48:35	14:19:30	14:21:25	49	Al3 62	3485	3490	3487.5	2066	2450	97478	323	y	y	5061700	35289555	6356	3.89182
Al4 724	9379	9317	9348	5276	6090	y	708	66	787	09.08.2010	12:13:21	12:48:21	12:52:00	12:54:44	12:49:05	49	Al1 581	4198	4116	4157	2289	2934	109203	353	n	n	6715926	32130840	5191	3.89182
Al4 739	9965	10009	9987	5718	6704	y	772	70	775	14.07.2010	13:02:21	13:05:23	13:08:25	13:21:51	13:42:13	31	Al3 758	4172	4275	4223.5	2368	2889	108657	331	n	n	6841152	38333472	5763.5	3.43399
Al4 740	10334	10224	10279	5925	6963	y	653	63	1016	16.08.2010	13:10:50	14:38:00	14:46:24	14:48:56	15:25:32	45	Al9 172	3877	3857	3867	2241	2723	89902	374	n	n	6102243	41255775	6412	3.80666
Al4 89	9092	9221	9156.5	5132	6176	y	616	64	894	27.07.2010	13:13:51	13:18:35	13:30:16	13:33:50	13:56:56	14	Al6 335		4149	4149	2323	2808	87623	343	y	y	6522984	31695232	5007.5	2.63906
Al5 392	9530	9460	9495	5639	6741	y	733	71	695	15.07.2010	10:15:02	10:15:23	10:35:02	11:04:23	11:11:25	23	Al9 259	4041	4014	4027.5	2293	2815	103547	368	y	n	6454795	38012499	5467.5	3.13549
Al6 342	10726	10727	10726.5	6049	7137	y	597	68	838	02.08.2010	12:48:21	12:50:20	13:08:30	13:30:52	13:34:24	116	Al4 457	4427	4434	4430.5	2386	2831	90283	376	n	n	6754766	43171713	6296	4.75359
Al6 372	10832	10816	10824	5973	6642	y	672	64	893	27.07.2010	13:10:45	13:11:45	13:12:45	13:14:08	13:15:30	11	Al9 184	4279	4205	4242	2429	2809	80964	332	y	y	6823061	39672666	6582	2.3979
Al6 546	9630	9552	9591	5196	5972	y	805	66	779	10.08.2010	12:34:42	12:35:41	12:41:00	12:43:39	12:54:51	16	Al4 718	4099	4100	4099.5	2248	2695	88029	365	n	n	6058360	31030512	5491.5	2.77259
Al6 554	10499	10413	10456	6015	7030	y	768	67	819	08.09.2010	14:21:18	15:29:30	15:30:54	15:31:55	16:19:16	106	Al3 761	4038	4020	4029	2286	2718	104869	387	n	n	6213348	42285450	6427	4.66344
Al8 34	10998	10964	10981	6168	7207	y	729	68	708	15.07.2010	14:19:39	15:00:12	15:04:33	15:07:08	15:10:20	29	Al4 731	4018	4018	4018	2278	2803	92822	361	y	y	6385234	44452776	6963	3.3673
Al8 40	9574	9658	9616	5544	6272	y	655	67	846	22.06.2010	14:57:55	15:05:00	15:06:11	15:28:19	15:30:56	23	Al6 650	3185		3185	2059	2432	83845	334	y	y	5007488	34771968	6431	3.13549
Al8 771	11020	10914	10967	6291	7713	y	741	67	840	08.09.2010	14:20:50	15:55:21	15:57:41	15:58:10	16:15:56	36	Al1 598	3020	2938	2979	1790	2091	83541	355	y	y	3742890	48522483	7988	3.58352
Al8 772	9938	9943	9940.5	5652	6974	y	688	63	738	24.08.2010	14:14:00	14:14:58	14:16:04	14:16:55	15:03:44	137	Al4 466	3584	3500	3542	2085	2546	82130	264	n	n	5308410	39417048	6398.5	4.91998
Al8 773	10216	10201	10208.5	5811	6829	y	719	65	861	08.09.2010	11:24:40	11:26:45	11:27:20	12:07:33	12:18:03	14	Al4 737	4291	4281	4286	2342	2900	101509	327	n	n	6791800	39683319	5922.5	2.63906
Al8 775	10369	10382	10375.5	5718	7001	y	701	71	875	08.09.2010	14:18:41	14:52:00	14:54:24	15:12:50	15:33:41	11	Al6 375	3439	3385	3412	2021	2427	89130	380	n	n	4904967	40031718	6963.5	2.3979
Al9 189	10513	10490	10501.5	6132	6704	y	778	70	773	16.07.2010	11:12:42	11:51:12	11:59:53	12:38:10	12:40:07	9	Al1 613	4005	4005	4005	2304	2763	104715	411	y	n	6365952	41108928	6496.5	2.19722
Al9 197	11213	11075	11144	6520	6887	y	721	68	878	12.07.2010	15:46:46	16:16:12	16:43:01	16:44:56	16:47:22	97	Al6 349	3262	3247	3254.5	1964	2336	82149	330	n	n	4587904	44903240	7889.5	4.57471
Al9 260	9627	9607	9617	5585	6427	y	791	66	795	30.06.2010	13:06:55	13:31:00	13:51:22	13:53:11	13:59:05	31	Al4 750	4579	4560	4569.5	2350	2906	97811	321	y	y	6829100	35894795	5047.5	3.43399
Al9 267	10669	10899	10784	6037	6635	y	666	68	762	15.07.2010	14:23:20	14:40:42	14:41:13	14:45:30	14:50:30	43	Al1 598	3020	2938	2979	1790	2091	83541	355	y	y	3742890	40055495	7805	3.7612
Al9 274	11515	11481	11498	6418	7036	y	766	71	729	22.06.2010	14:56:50	15:25:16	15:33:55	15:34:33	15:41:02	25	Al5 396	3374	3455	3414.5	1966	2507	80009	322	y	y	4928762	45157048	8083.5	3.21888
Al9 288	10808	10757	10782.5	5977	7162	y	742	68	806	01.07.2010	12:07:22	12:36:55	13:58:00	13:58:15	14:02:49	20	Al1 628	3698		3698	2227	2575	91083	339	y	y	5734525	42807274	7084.5	2.99573
Al9 495	11091	11245	11168	6437	7145	y	751	65	789	10.08.2010	12:52:18	12:32:02	13:35:14	13:36:30	13:38:21	8	Al4 237		3512	3512	2030	2456	89516	323	y	y	4985680	45992365	7656	2.07944
Al9 601	9709	9613	9661	5489	6056	y	646	67	802	22.07.2010	11:00:41	11:51:11	12:33:17	12:35:10	13:08:31	11	Al1 620	4359	4358	4358.5	2341	3003	94874	366	n	n	7030023	33241384	5302.5	2.3979
Al4 118	10656	10679	10667.5	5907	6850	y	760	64	865	14.07.2010	12:37:30	12:42:15	12:44:15	12:47:10	12:46:09	19	Al1 595	3361	3407	3384	1920	2387	80411	296	y	y	4583040	40462950	7283.5	2.94444
Al9 514	11362	11282	11322	6380	6866	n	756	64	766	30.06.2010	12:09:30	12:31:26		13:19:45			Al1 307		3887	3887	2167	2644	90156	288	y	n	5729548	43805080	7435
Al6 580	9905	9893	9899	5693	6581	n	707	64	890	06.08.2010	12:56:04	13:43:24	13:46:57	13:50:00			Al1 328	4037	4060	4048.5	2404	2900	104564	332	n	n	6971600	37465633	5850.5
Al9 275	10539	10548	10543.5	6251	7007	n	773	67	844	16.07.2010	11:11:08						Al1 581	4198	4116	4157	2289	2934	109203	353	n	n	6715926	43800757	6386.5
Al1 298	9532	9705	9618.5	5668	6558	n	698	64	778	29.07.2010	12:22:55	12:23:24	13:15:50	13:17:10			Al1 596	4338	4331	4334.5	2352	2866	99611	355	n	n	6740832	37170744	5284
Al8 34	10998	10964	10981	6168	7207	n	729	68	708	14.07.2010	12:03:21	12:05:33					Al1 596	4338	4331	4334.5	2352	2866	99611	355	n	n	6740832	44452776	6646.5
Al8 34	10998	10964	10981	6168	7207	n	729	68	708	15.07.2010	10:13:39	11:35:45					Al1 598	3020	2938	2979	1790	2091	83541	355	n	n	3742890	44452776	8002
Al9 176	10390	10279	10334.5	6112	7088	n	746	67	861	22.07.2010	11:37:13	11:48:12	12:30:34	12:30:37			Al1 626		4103	4103	2205	2661	90162	302	y	y	5867505	43321856	6231.5
Al9 498	10655		10655	6297	7157	n	719	65	779	06.08.2010	12:55:24	13:00:51	13:05:26	13:18:00			Al4 237		3512	3512	2030	2456	89516	323	y	y	4985680	45067629	7143
Al9 164	11446	11416	11431	6171	6891	n	656	62	847	08.09.2010	14:10:04	14:11:35					Al4 466	3584	3500	3542	2085	2546	82130	264	n	n	5308410	42524361	7889
Al6 547	9788	9761	9774.5	5723	6677	n	682	63	959	29.07.2010	12:20:41	12:33:15	13:03:37	13:46:30			Al4 711	4230	4246	4238	2362	2826	101171	362	n	n	6675012	38212471	5536.5
Al1 570	9388	9482	9435	5330	6336	n	778	66	333	16.07.2010	11:11:53	12:33:00					Al4 711	4230	4246	4238	2362	2826	101171	362	n	n	6675012	33770880	5197
Al1 570	9388	9482	9435	5330	6336	n	778	66	333	05.07.2010	14:22:41	15:02:00					Al4 711	4230	4246	4238	2362	2826	101171	362	n	n	6675012	33770880	5197
Al9 275	10539	10548	10543.5	6251	7007	n	773	67	844	15.07.2010	10:14:05	10:14:07					Al4 711	4230	4246	4238	2362	2826	101171	362	n	n	6675012	43800757	6305.5
Al6 555	9954	9925	9939.5	5705	6593	n	718	60	954	02.08.2010	12:49:41	12:52:31	13:37:37	13:37:58			Al4 736		4004	4004	2265	2740	96151	330	n	n	6206100	37613065	5935.5
Al1 570	9388	9482	9435	5330	6336	n	778	66	333	22.07.2010	11:04:00	12:01:12	12:15:30	13:06:21			Al6 529	3960	4000	3980	2321	2809	108146	403	n	n	6519689	33770880	5455
Al9 168	11371	11218	11294.5	6362	7516	n	686	68	855	08.09.2010	14:19:10	15:16:47	15:19:09	15:19:40			Al6 641	3497	3469	3483	2045	2530	93920	353	n	n	5173850	47816792	7811.5
Al9 285	11745	11730	11737.5	6771	7578	n	783	66	945	22.07.2010	11:00:04	12:51:31	12:59:14	13:00:12			Al6 644	3575	3575	3575	2057	2507	87428	324	n	n	5156899	51310638	8162.5
Al3 68	9273	9157	9215	5389	6582	n	592	68	708	29.07.2010	13:31:25	13:35:02	13:59:55	14:23:59			Al7 704	4034	4060	4047	2334	2723	100562	343	y	y	6355482	35470398	5168
Al1 326	10309	10443	10376	5958	7180	n	695	72	680	12.07.2010	12:40:44	12:40:48	14:17:34	14:19:21			Al8 221				2310	2809			y	y	6488790	42778440
Al9 275	10539	10548	10543.5	6251	7007	n	773	67	844	22.07.2010	11:03:51	11:09:45	11:11:35	11:15:42			Al8 32				2222	2632	90748	252	y	y	5848304	43800757
Al8 775	10369	10382	10375.5	5718	7001	n	701	71	875	10.08.2010	12:34:02						Al9 172	3877	3857	3867	2241	2723	89902	374	n	n	6102243	40031718	6508.5
Al4 233	9922	9883	9902.5	5726	6784	n	602	64	806	12.07.2010	15:45:50	15:46:57	15:48:57	15:50:43			Al9 175	4023		4023	2149	2610	107143	335	y	y	5608890	38845184	5879.5
Al6 355	11170	11372	11271	6192	7231	n	728	62	870	06.08.2010	12:57:40	13:24:30	13:26:31	13:41:00			Al9 278	3396	3370	3383	2089	2510	105753	361	n	n	5243390	44774352	7888
Al1 157	10376	10343	10359.5	5966	7060	n	722	58	1080	14.07.2010	10:46:45	10:46:50	10:52:38	10:55:15			Al9 494	4494	4463	4478.5	2440	2847	106326	362	n	n	6946680	42119960	5881
Al1 569	9957	9951	9954	5732	6678	n	731	70	708	01.07.2010	12:07:30	12:10:45	12:41:24	12:54:33			Al9 508	3848	3875	3861.5	2177	2632	100673	291	n	n	5729864	38278296	6092.5
Al4 119	10287	10289	10288	5615	6535	n	653	65	766	12.07.2010	12:41:49	12:44:30	13:15:41	15:00:35			Al9 608	4079	4056	4067.5	2240	2626	80964	332	n	n	5882240	36694025	6220.5
